# Supplementary material for: Towards new sources of resistance to the currant-lettuce aphid (Nasonovia ribisnigri)
Source: PubMed Central journal article supplement (PMC5209396; doi:10.1007/s11032-016-0606-4), 2017-01-03
Supplement: 11032_2016_606_MOESM1_ESM.pdf [file 11032_2016_606_MOESM1_ESM.pdf]

**Table S1** VeGIN Lettuce Diversity Foundation set. Line number, Species and crop type are listed. Seed numbers prefixed by Warwick are internal codes, GRU are from The UK Vegetable Genebank, and CGN are from the Centre for Genetic Resources, the Netherlands.

| Line no. | Seed No.         | Species            | Name                                                              | Type           | Origin | Other traits scored    |
|----------|------------------|--------------------|-------------------------------------------------------------------|----------------|--------|------------------------|
| 1        | Warwick LJ 09001 | <i>L. sativa</i>   | Saladin                                                           | Crisp/ Iceberg | -      | Nitrate Discolouration |
| 2        | Warwick LJ 09002 | <i>L. sativa</i>   | Iceberg                                                           | Batavian       | -      | Nitrate Discolouration |
| 3        | Warwick LJ 08126 | <i>L. serriola</i> | UC908523                                                          | Wild serriola  | -      | Nitrate Discolouration |
| 4        | GRU002492        | <i>L. sativa</i>   | Stoke                                                             | Romaine/ Cos   | GBR    | Discolouration         |
| 5        | GRU001861        | <i>L. sativa</i>   | Batavia Blonde de Paris                                           | Batavian       | FRA    | Nitrate Discolouration |
| 6        | GRU005492        | <i>L. sativa</i>   | Lobjoita Green Cos                                                | Romaine/ Cos   | GBR    | Nitrate Discolouration |
| 7        | GRU005048        | <i>L. sativa</i>   | Ambassador                                                        | Butterhead     | -      | Nitrate Discolouration |
| 8        | GRU001228        | <i>L. sativa</i>   | Red Granoble                                                      | Batavian       | GBR    | Nitrate Discolouration |
| 9        | GRU004435        | <i>L. sativa</i>   | Merville de Quatre Saisons                                        | Butterhead     | FRA    | Nitrate Discolouration |
| 10       | GRU001206        | <i>L. sativa</i>   | Bloody Warrior                                                    | Romaine/ Cos   | GBR    | Nitrate Discolouration |
| 11       | GRU001735        | <i>L. sativa</i>   | New Chicken                                                       | Stem/ Stalk    | -      | Nitrate Discolouration |
| 12       | GRU001683        | <i>L. sativa</i>   | Romain de Benicardo                                               | Romaine/ Cos   | GBR    | Nitrate Discolouration |
| 13       | GRU005491        | <i>L. sativa</i>   | Lilian                                                            | Butterhead     | GBR    | Nitrate Discolouration |
| 14       | GRU004986        | <i>L. sativa</i>   | Batavia Tezier                                                    | Batavian       | FRA    | Discolouration         |
| 15       | GRU001783        | <i>L. sativa</i>   | Wunder von Stuttgart                                              | Butterhead     | -      | Discolouration         |
| 16       | GRU013825        | <i>L. sativa</i>   | Adriatica 2                                                       | Butterhead     | BGR    | Discolouration         |
| 17       | GRU001881        | <i>L. sativa</i>   | Webbs Wonderful                                                   | Crisp/ Iceberg | GBR    | Nitrate Discolouration |
| 18       | GRU001774        | <i>L. sativa</i>   | Waldermann's Dark Green                                           | Leaf/ Cutting  | CAN    | Nitrate Discolouration |
| 19       | GRU004480        | <i>L. sativa</i>   | Chinese Stem Lettuce                                              | Stem/ Stalk    | CHN    | Nitrate Discolouration |
| 20       | CGN20693         | <i>L. saligna</i>  | -                                                                 | Wild           | UZB    | -                      |
| 21       | CGN05301         | <i>L. saligna</i>  | -                                                                 | Wild           | FRA    | -                      |
| 22       | CGN05308         | <i>L. saligna</i>  | -                                                                 | Wild           | ISR    | -                      |
| 23       | CGN09337         | <i>L. sativa</i>   | Moskovskij Parnikovyj                                             | Butterhead     | SUN    | -                      |
| 24       | CGN04805         | <i>L. sativa</i>   | Smaragd                                                           | Butterhead     | CZE    | -                      |
| 25       | CGN04910         | <i>L. sativa</i>   | Teli Vajfej                                                       | Butterhead     | HUN    | -                      |
| 26       | CGN05136         | <i>L. sativa</i>   | Tardisix                                                          | Butterhead     | NLD    | -                      |
| 27       | CGN09331         | <i>L. sativa</i>   | Grosse Brune Tetue; Bruine Trotskop                               | Butterhead     | CHE    | -                      |
| 28       | CGN04613         | <i>L. sativa</i>   | Hilde                                                             | Butterhead     | BEL    | -                      |
| 29       | CGN04881         | <i>L. sativa</i>   | Verdatre                                                          | Butterhead     | TUN    | -                      |
| 30       | CGN04884         | <i>L. sativa</i>   | Verte de Cobham; Cobham Green                                     | Butterhead     | GBR    | -                      |
| 31       | CGN04888         | <i>L. sativa</i>   | Wayahead                                                          | Butterhead     | USA    | -                      |
| 32       | CGN04807         | <i>L. sativa</i>   | Kondat                                                            | Butterhead     | NLD    | -                      |
| 33       | CGN04756         | <i>L. sativa</i>   | Joy of the Village                                                | Butterhead     | ISR    | -                      |
| 34       | CGN04540         | <i>L. sativa</i>   | Butterking                                                        | Butterhead     | USA    | -                      |
| 35       | CGN05140         | <i>L. sativa</i>   | Capitan [541]                                                     | Butterhead     | FRA    | -                      |
| 36       | CGN13295         | <i>L. sativa</i>   | Cagraner Sommer                                                   | Butterhead     | AUT    | -                      |
| 37       | CGN04916         | <i>L. sativa</i>   | Kral Maje I                                                       | Butterhead     | CZE    | -                      |
| 38       | CGN05193         | <i>L. sativa</i>   | Bronowicka [Inspektowa Bronowicka]                                | Butterhead     | POL    | -                      |
| 39       | CGN05959         | <i>L. sativa</i>   | Outdoor lettuce                                                   | Butterhead     | SWE    | -                      |
| 40       | CGN04521         | <i>L. sativa</i>   | Profuins Blackpool                                                | Butterhead     | -      | -                      |
| 41       | CGN19017         | <i>L. sativa</i>   | Alface                                                            | Butterhead     | PRT    | -                      |
| 42       | CGN05972         | <i>L. sativa</i>   | Rudolfs Liebling                                                  | Butterhead     | DEU    | -                      |
| 43       | CGN13383         | <i>L. sativa</i>   | -                                                                 | Romaine/ Cos   | BGR    | -                      |
| 44       | CGN09375         | <i>L. sativa</i>   | Forellenschluss [Grazer Forellenschluss]                          | Romaine/ Cos   | AUT    | -                      |
| 45       | CGN16252         | <i>L. sativa</i>   | Floricos 83                                                       | Romaine/ Cos   | USA    | -                      |
| 46       | CGN05219         | <i>L. sativa</i>   | PI 212099                                                         | Romaine/ Cos   | AFG    | -                      |
| 47       | CGN05220         | <i>L. sativa</i>   | PI 206964                                                         | Romaine/ Cos   | TUR    | -                      |
| 48       | CGN05226         | <i>L. sativa</i>   | Kahu                                                              | Romaine/ Cos   | IRN    | -                      |
| 49       | CGN05240         | <i>L. sativa</i>   | Romana Larga Catalana                                             | Romaine/ Cos   | ESP    | -                      |
| 50       | CGN04737         | <i>L. sativa</i>   | Yedicule Yagli Marul                                              | Romaine/ Cos   | TUR    | -                      |
| 51       | CGN04904         | <i>L. sativa</i>   | Kaiser Selbstschluss                                              | Romaine/ Cos   | DEU    | -                      |
| 52       | CGN04628         | <i>L. sativa</i>   | Kakichisha White                                                  | Romaine/ Cos   | JPN    | -                      |
| 53       | CGN04927         | <i>L. sativa</i>   | LAC 193/72                                                        | Romaine/ Cos   | SWE    | -                      |
| 54       | CGN04711         | <i>L. sativa</i>   | Pallone [Ballon]                                                  | Romaine/ Cos   | ITA    | -                      |
| 55       | CGN05236         | <i>L. sativa</i>   | Romaine Verte                                                     | Romaine/ Cos   | TUN    | -                      |
| 56       | CGN04581         | <i>L. sativa</i>   | Frisee de Beauregard [Reine des Glaces a Graine NoiCrisp/ Iceberg | FRA            | -      | -                      |
| 57       | CGN05182         | <i>L. sativa</i>   | Great Lakes                                                       | Crisp/ Iceberg | USA    | -                      |
| 58       | CGN13348         | <i>L. sativa</i>   | VIR 1532                                                          | Crisp/ Iceberg | UZB    | -                      |
| 59       | CGN18629         | <i>L. sativa</i>   | Alface [IHR 10,011674]                                            | Crisp/ Iceberg | PRT    | -                      |
| 60       | CGN19088         | <i>L. sativa</i>   | Aspen [RSS22560]                                                  | Crisp/ Iceberg | AUS    | -                      |
| 61       | CGN13378         | <i>L. sativa</i>   | Shladha                                                           | Crisp/ Iceberg | DZA    | -                      |
| 62       | CGN09359         | <i>L. sativa</i>   | Prasan                                                            | Crisp/ Iceberg | -      | -                      |
| 63       | CGN09381         | <i>L. sativa</i>   | Gloire du Dauphine [Batavia Gloire du Dauphine]                   | Crisp/ Iceberg | FRA    | -                      |
| 64       | CGN05227         | <i>L. sativa</i>   | PI 261617                                                         | Crisp/ Iceberg | ESP    | -                      |
| 65       | CGN05837         | <i>L. sativa</i>   | White Lettuce                                                     | Leaf/ Cutting  | TWN    | -                      |
| 66       | CGN11446         | <i>L. sativa</i>   | Monet [RSS67531]                                                  | Leaf/ Cutting  | NLD    | -                      |
| 67       | CGN04787         | <i>L. sativa</i>   | PI 269498                                                         | Leaf/ Cutting  | PAK    | -                      |
| 68       | CGN04797         | <i>L. sativa</i>   | PI 278091                                                         | Leaf/ Cutting  | TUR    | -                      |
| 69       | CGN18981         | <i>L. sativa</i>   | CNRIDG 201498 Cutting                                             | Leaf/ Cutting  | DZA    | -                      |
| 70       | CGN05852         | <i>L. sativa</i>   | Amerikanische Brauner [Amerikaanse Roodrand]                      | Leaf/ Cutting  | USA    | -                      |
| 71       | CGN04618         | <i>L. sativa</i>   | Hohlblattringer Butter                                            | Butterhead     | DEU    | -                      |
| 72       | CGN04642         | <i>L. sativa</i>   | Krauser Gelber [A Couper Feuille de Chene a Graine BLeaf/ Cutting | DEU            | -      | -                      |
| 73       | CGN04707         | <i>L. sativa</i>   | Oak Leaf                                                          | Leaf/ Cutting  | USA    | -                      |
| 74       | CGN04849         | <i>L. sativa</i>   | Simpson                                                           | Leaf/ Cutting  | FRA    | -                      |
| 75       | CGN04958         | <i>L. sativa</i>   | Sucrine [Little Gem]                                              | Latin          | FRA    | -                      |
| 76       | CGN05204         | <i>L. sativa</i>   | Mestnyi [VIR R1203]                                               | Latin          | RUS    | -                      |
| 77       | CGN06018         | <i>L. sativa</i>   | Bibb                                                              | Latin          | NLD    | -                      |
| 78       | CGN18985         | <i>L. sativa</i>   | Alface Repolho                                                    | Latin          | PRT    | -                      |
| 79       | CGN18617         | <i>L. sativa</i>   | Okayama Salad                                                     | Latin          | JPN    | -                      |
| 80       | CGN04564         | <i>L. sativa</i>   | Deer Tongue                                                       | Latin          | USA    | -                      |
| 81       | CGN04696         | <i>L. sativa</i>   | Midget Cos                                                        | Latin          | USA    | -                      |
| 82       | CGN10975         | <i>L. sativa</i>   | Balady [IEE 217 Oilseed]                                          | Oilseed        | EGY    | -                      |
| 83       | CGN04926         | <i>L. sativa</i>   | -                                                                 | Stem/ Stalk    | SUN    | -                      |
| 84       | CGN05804         | <i>L. serriola</i> | -                                                                 | Wild           | CHE    | Nitrate Discolouration |
| 85       | CGN15670         | <i>L. serriola</i> | -                                                                 | Wild           | ARM    | -                      |
| 86       | CGN14278         | <i>L. serriola</i> | -                                                                 | Wild           | HUN    | -                      |
| 87       | CGN15737         | <i>L. serriola</i> | -                                                                 | Wild           | GEO    | -                      |
| 88       | CGN18668         | <i>L. serriola</i> | -                                                                 | Wild           | ITA    | -                      |
| 89       | CGN22054         | <i>L. serriola</i> | -                                                                 | Wild           | KGZ    | -                      |
| 90       | CGN15728         | <i>L. serriola</i> | -                                                                 | Wild           | AZE    | -                      |
| 91       | CGN15664         | <i>L. serriola</i> | -                                                                 | Wild           | TUR    | -                      |
| 92       | CGN05149         | <i>L. serriola</i> | -                                                                 | Wild           | KEN    | -                      |
| 93       | CGN09308         | <i>L. serriola</i> | -                                                                 | Wild           | FRA    | -                      |
| 94       | CGN05152         | <i>L. serriola</i> | -                                                                 | Wild           | POL    | -                      |
| 95       | CGN13355         | <i>L. virosa</i>   | -                                                                 | Wild           | ESP    | -                      |
| 96       | CGN15677         | <i>L. virosa</i>   | -                                                                 | Wild           | RUS    | -                      |

The lettuce diversity set includes 19 accessions that were originally selected from the lettuce collection maintained by the UK Vegetable Genebank at Wellesbourne, UK. These were used in studies of genetic variation for nitrate content (Burns et al., 2011) and post harvest discolouration (Atkinson et al., 2012) in lettuce; the 24 original accessions were retained in the extended diversity set because the previous studies had shown they displayed significant phenotypic variation for agronomically/economically important traits. The additional 72 accessions were selected from the international *Lactuca* collection maintained by Centre for Genetic Resources Netherlands (CGN) using the core selector tool provided on the CGN website; for description of core selections see: (<http://www.wageningenur.nl/en/Expertise-Services/Legal-research-tasks/Centre-for-Genetic-Resources-The-Netherlands-1/Expertise-areas/Plant-Genetic-Resources/Research-at-CGN/Core-collections/Core-selections.htm>).

**Country codes.** GBR: United Kingdom; AFG: Afghanistan; ARM: Armenia; AUS: Australia; AUT: Austria; AZE: Azerbaijan; BEL: Belgium; BGR: Bulgaria; CAN: Canada; CHE: Switzerland; CHN: China; CZE: Czech Republic; DEU: Germany; DZA: Algeria; EGY: Egypt; ESP: Spain; FRA: France; GBR: United Kingdom; GEO: Georgia; HUN: Hungary; IRN: Iran (Islamic Republic of); ISR: Israel; ITA: Italy; JPN: Japan; KEN: Kenya; KGZ: Kyrgyzstan; NLD: Netherlands; PAK: Pakistan; POL: Poland; PRT: Portugal; RUS: Russian Federation; SUN: Union of Soviet Soc. Rep.; SWE: Sweden; TUN: Tunisia; TUR: Turkey; TWN: Taiwan, Province of China; USA: United States of America; UZB: Uzbekistan.

**A note on further selection. PGW**

The lettuce diversity set represents a starting point for trait evaluation. For many purposes, the full set with suitable replication is ideal; however, a reduced set may be required: a. limited number of accessions can be used in one trial; b. accessions already identified as important, and need to include a further *n* individuals to complete a desired experimental design; c. want to maximise the diversity in a reduced subset, e.g. GBS selection. We can produce a reduced set using one, or several criteria: phenotype distribution; passport data; genotype data. From the genotype data we can refine individuals based on: the distribution of accessions and their *q* values in a *g*-matrix (STRUCTURE); we may want to select specific allele genotype combinations (QTL/association). Many of these selection criteria can be performed using a spreadsheet. A number of software packages are available to assist, such as TASSEL (Bradbury et al., 2007) and PopIn (Hospital and Decoux, 2002). I have found that GGT2 (Van Berloo, 2008) is suitable for making reduced diversity sets, using the maximum diversity option. If there are certain individuals that are to be present, these can be pre-selected for inclusion.
