# Supplementary material for: Towards new sources of resistance to the currant-lettuce aphid (Nasonovia ribisnigri)
Source: PubMed Central journal article supplement (PMC5209396; doi:10.1007/s11032-016-0606-4), 2017-01-03
Supplement: 11032_2016_606_MOESM2_ESM.pdf [file 11032_2016_606_MOESM2_ESM.pdf]

**Table S2 Features of the CGP EST assembly CLS\_S3\_ESTs\_Sat, EST library used to locate SNPs.**

| ASSEMBLY       | SPECIES | GENOTYPE              | LIBRARY   |                   | #_of_ESTs | CONTIGS | SINGLETs | UNIGENES | GROUPS | EST/UNI | UNI/GRP | LENGTH | COMMENTS                  |
|----------------|---------|-----------------------|-----------|-------------------|-----------|---------|----------|----------|--------|---------|---------|--------|---------------------------|
| CLS_S3_Contig# | lettuce | <i>Lactuca sativa</i> | QG(ABCDI) | CLS(XYZ) CLS(LMS) | 76043     | 11455   | 17962    | 29417    | 22657  | 2.56    | 1.3     | 740    | stringent cap3 conditions |
