# Supplementary material for: Towards new sources of resistance to the currant-lettuce aphid (Nasonovia ribisnigri)
Source: PubMed Central journal article supplement (PMC5209396; doi:10.1007/s11032-016-0606-4), 2017-01-03
Supplement: 11032_2016_606_MOESM4_ESM.pdf [file 11032_2016_606_MOESM4_ESM.pdf]

**Table S4 Summary of the features in *L. sativa* genome assembly**  
 Lsat\_1\_v4 from U. C. Davis (<http://lgr.genomecenter.ucdavis.edu>)

| Pseudo-chromosome | No. LKAM SNPs | Marker spacing bp |             |          |
|-------------------|---------------|-------------------|-------------|----------|
|                   |               | Min               | Mean        | Max      |
| 1                 | 69            | 197               | 3715404.838 | 55928185 |
| 2                 | 92            | 135               | 2616368.733 | 42420715 |
| 3                 | 28            | 85                | 9794877.296 | 51612469 |
| 4                 | 103           | 170               | 3873700.725 | 75583322 |
| 5                 | 81            | 54                | 5049854.038 | 47534847 |
| 6                 | 42            | 137               | 5159484.049 | 48505829 |
| 7                 | 82            | 458               | 2963070.679 | 33907280 |
| 8                 | 67            | 481               | 4836685.523 | 38968829 |
| 9                 | 22            | 8558              | 8968193.000 | 71692295 |
| 10                | 96            | -                 | -           | -        |
| Total             | 682           |                   |             |          |
| Total mapped      | 586           |                   |             |          |
| Across all Chrs   |               | 54                | 5219737.654 | 75583322 |

accessed 24/09/12
