# Supplementary material for: Towards new sources of resistance to the currant-lettuce aphid (Nasonovia ribisnigri)
Source: PubMed Central journal article supplement (PMC5209396; doi:10.1007/s11032-016-0606-4), 2017-01-03
Supplement: 11032_2016_606_MOESM5_ESM.pdf [file 11032_2016_606_MOESM5_ESM.pdf]

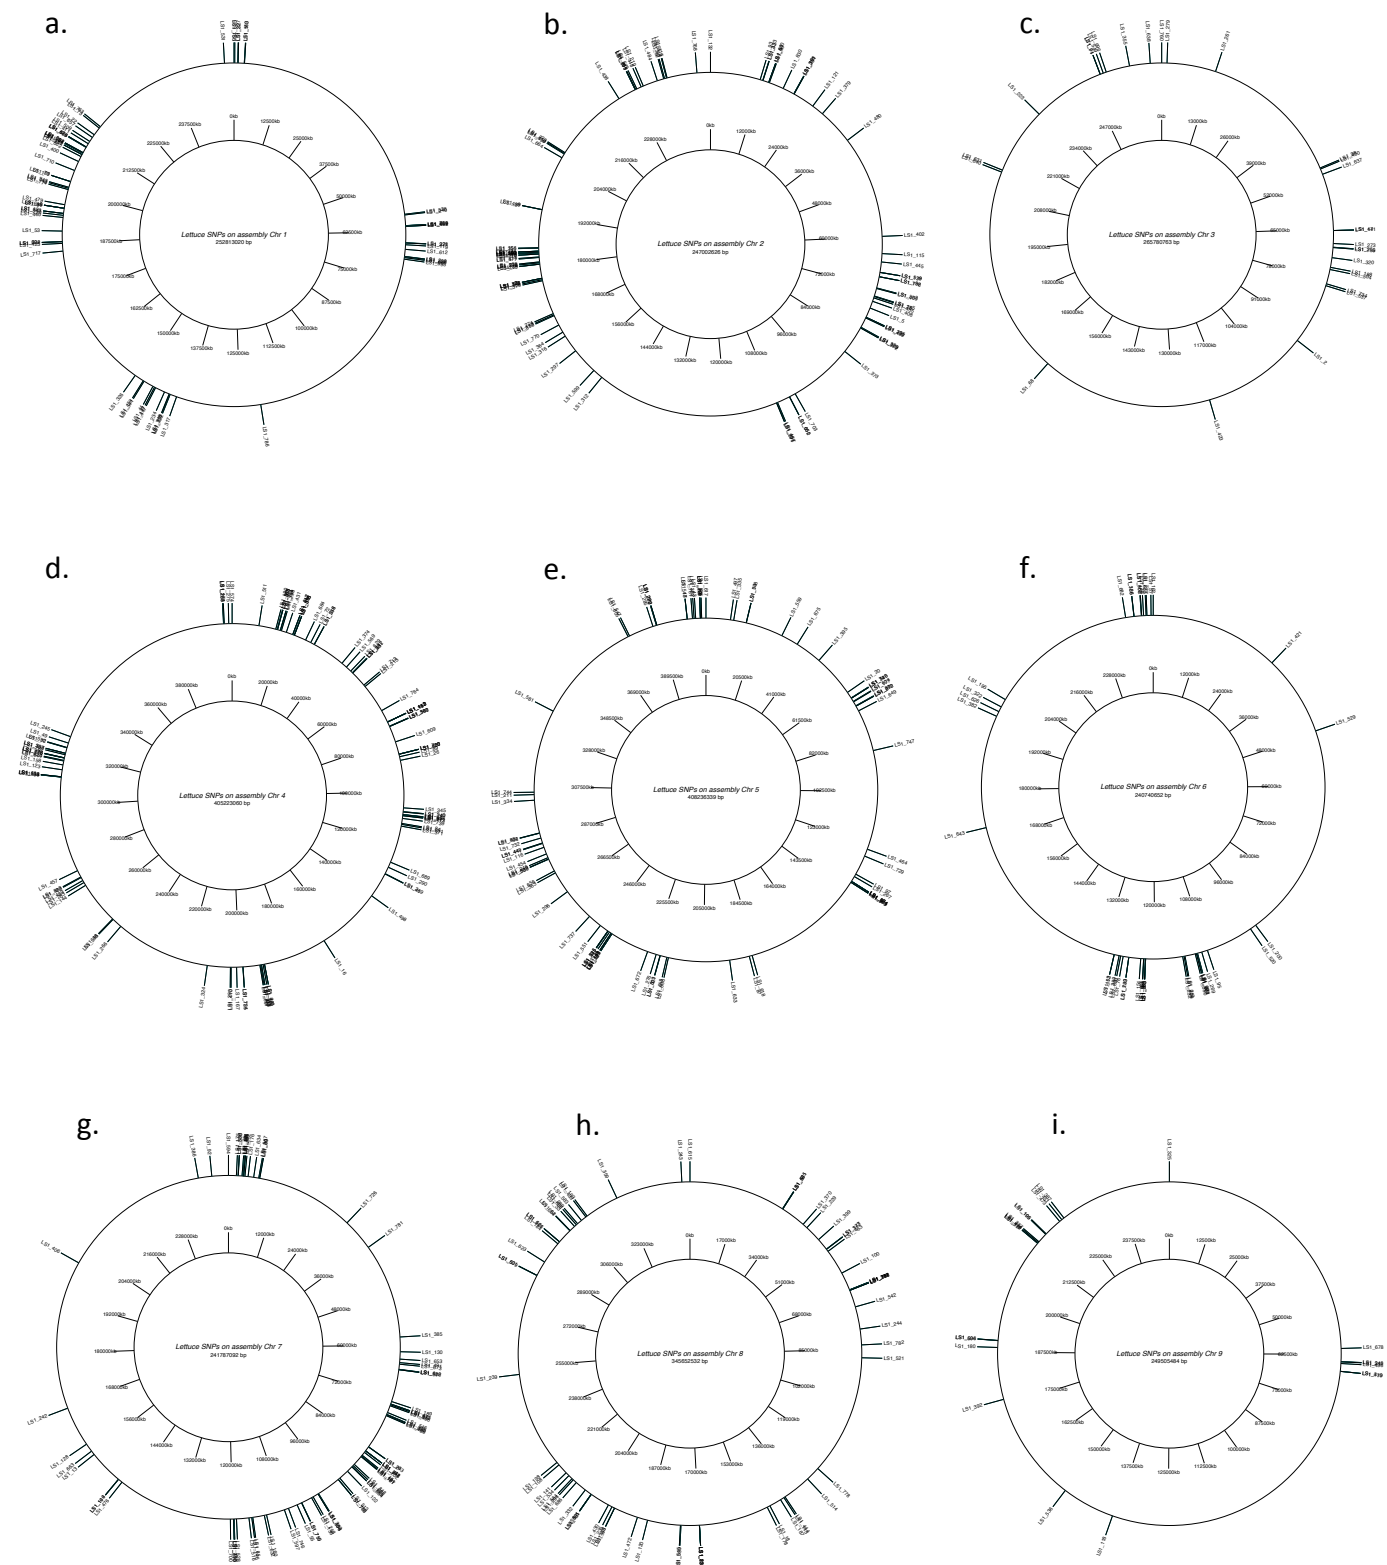

Figure S1 Relative positions of LKAM sequences in relation to the *L. sativa* draft genome assembly 'Lsat\_1\_v4'. a.- i, Pseudo-chromosomes 1 – 9 respectively. Circularized for illustration, the scale on the inner circle depicts base pair (bp) intervals, the outer circle is labeled with the LKAM markers prefixed LS1\_ then the numeric identifier.
