# Supplementary material for: Towards new sources of resistance to the currant-lettuce aphid (Nasonovia ribisnigri)
Source: PubMed Central journal article supplement (PMC5209396; doi:10.1007/s11032-016-0606-4), 2017-01-03
Supplement: 11032_2016_606_MOESM6_ESM.pdf [file 11032_2016_606_MOESM6_ESM.pdf]

a.

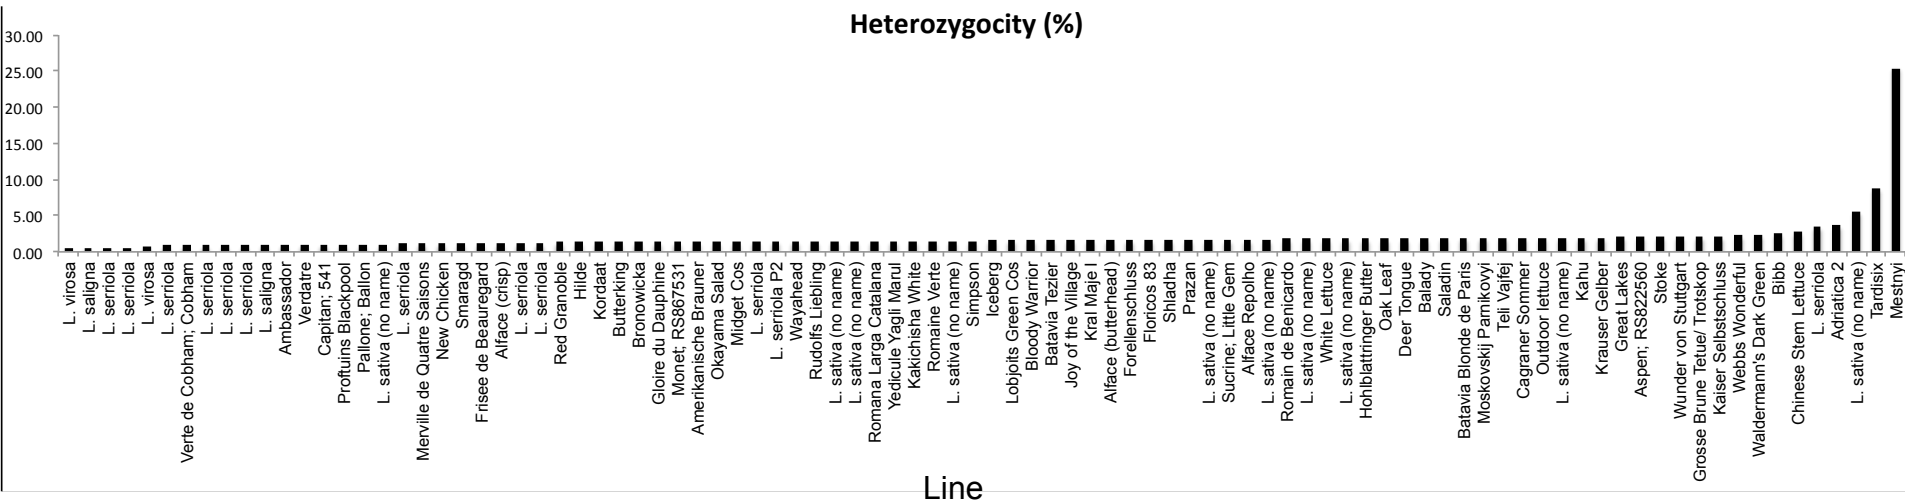

b.

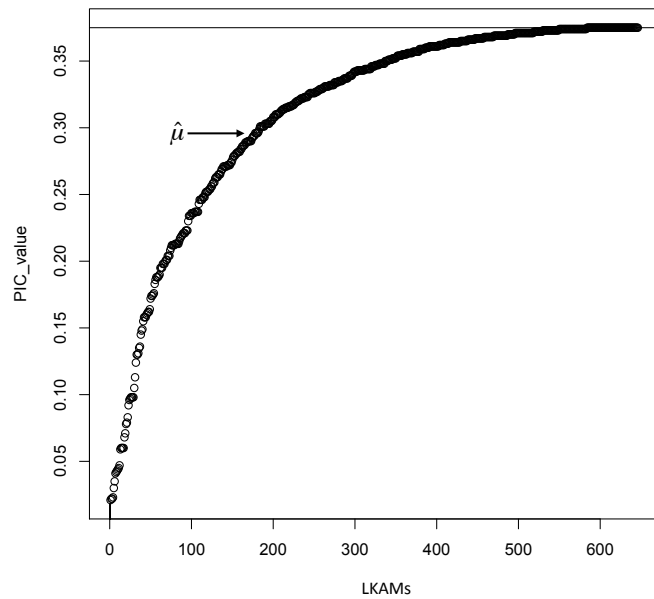

c.

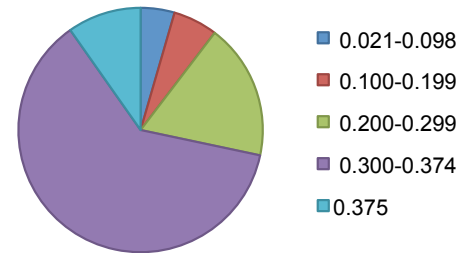

Supplementary Figure S2 LKAM genetic diversity:

- Heterozygosity across the Lettuce diversity set
- Distribution of PIC values
- Proportions of PIC values
