# Supplementary material for: Towards new sources of resistance to the currant-lettuce aphid (Nasonovia ribisnigri)
Source: PubMed Central journal article supplement (PMC5209396; doi:10.1007/s11032-016-0606-4), 2017-01-03
Supplement: 11032_2016_606_MOESM7_ESM.pdf [file 11032_2016_606_MOESM7_ESM.pdf]

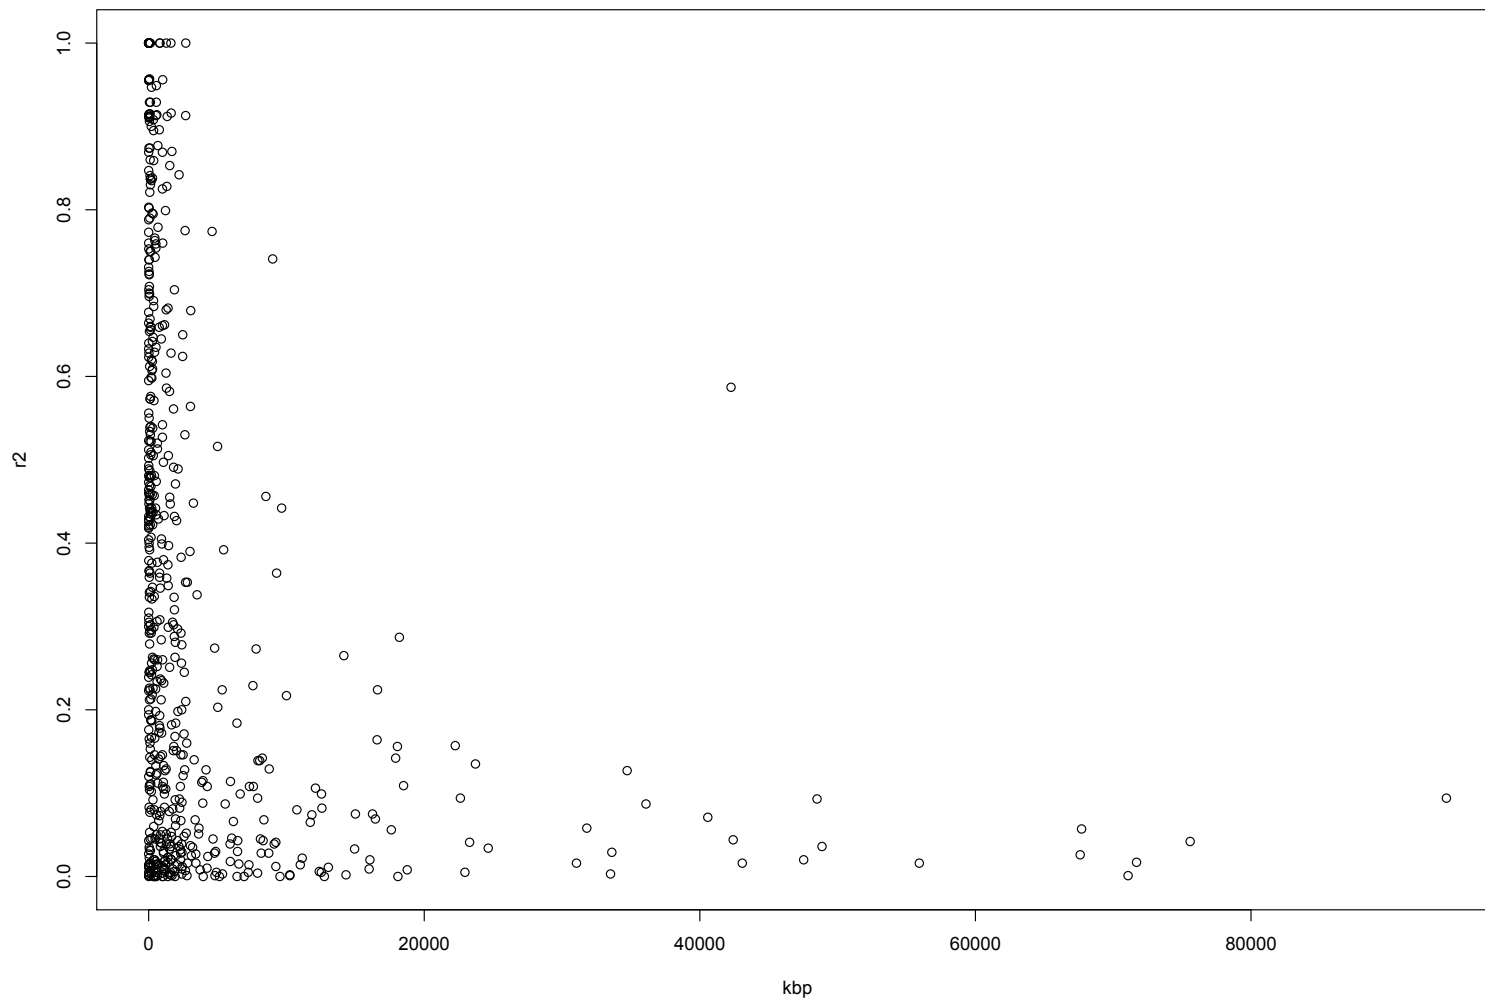

Figure S3 Plot of LD (in  $r^2$ ) against weighted distance (kbp) between pairwise SNP comparisons across the *L. sativa* pseudo-chromosome assembly 'Lsat-1\_v4' .
