# Supplementary material for: Towards new sources of resistance to the currant-lettuce aphid (Nasonovia ribisnigri)
Source: PubMed Central journal article supplement (PMC5209396; doi:10.1007/s11032-016-0606-4), 2017-01-03
Supplement: 11032_2016_606_MOESM8_ESM.pdf [file 11032_2016_606_MOESM8_ESM.pdf]

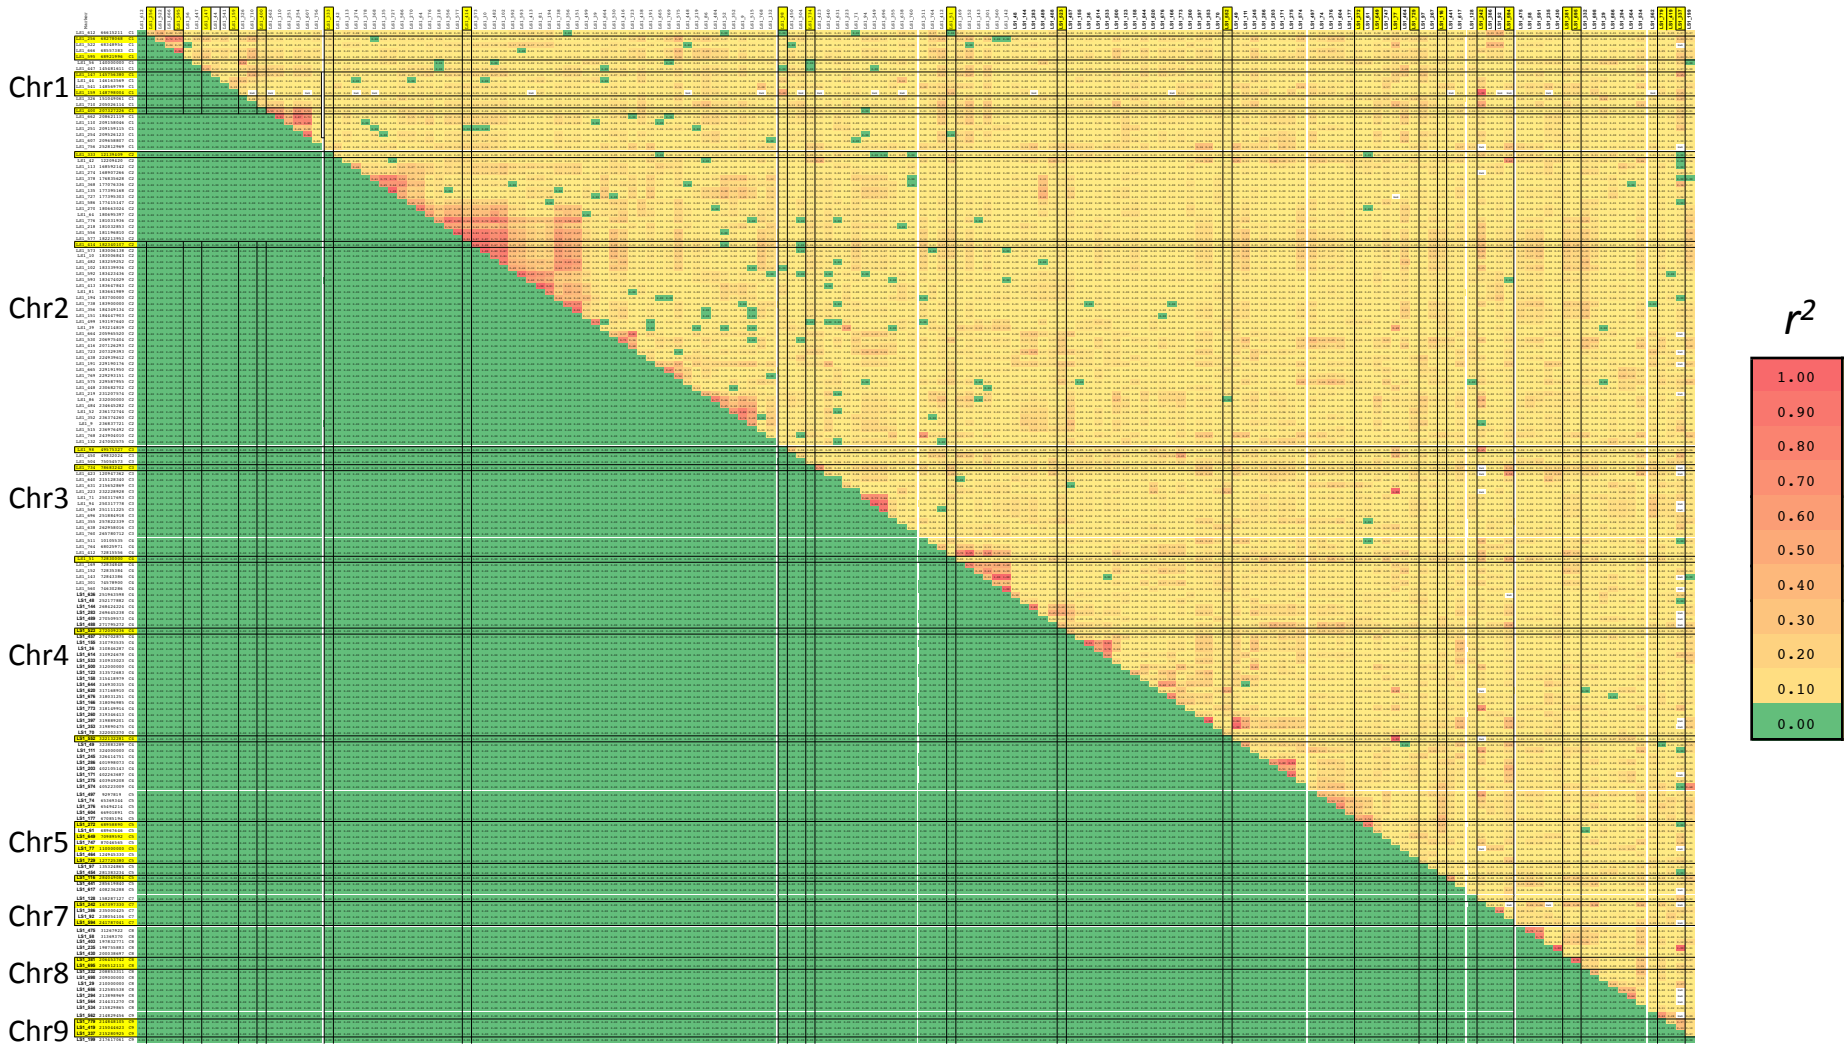

Figure S4 Pairwise  $|r^2|$  for 167 SNPs across *L. sativa* pseudo-chromosomes 1, 2, 3, 4, 5, 7, 8, 9 from assembly 'Lsat-1\_v4'. Yellow highlighting indicates SNPs associated with *Nasonovia* count data. The SNPs surrounding the significant SNPs are included for regional reference to the surrounding LD.
