# Supplementary material for: Towards new sources of resistance to the currant-lettuce aphid (Nasonovia ribisnigri)
Source: PubMed Central journal article supplement (PMC5209396; doi:10.1007/s11032-016-0606-4), 2017-01-03
Supplement: 11032_2016_606_MOESM9_ESM.pdf [file 11032_2016_606_MOESM9_ESM.pdf]

**Table S5 REML variance components analyses for aphid count data from *N. ribisnigri* biotype Nr:0**

**REML variance components analysis for the numbers of Nr:0 alate (winged) aphids**

Response variate: SQRT((Winged+0.375))  
 Fixed model: Constant + Name  
 Random model: Rep + Rep.Block + Rep.Block.Plot  
 Number of units: 774 (70 units excluded due to zero weights or missing values)

Rep.Block.Plot used as residual term  
 Non-sparse algorithm with Fisher scoring

Estimated variance components

| Random term | component | s.e.  |
|-------------|-----------|-------|
| Rep         | 1.473     | 0.762 |
| Rep.Block   | -0.056    | 0.084 |

Residual variance model

| Term           | Factor   | Model(order) | Parameter | Estimate | s.e. |
|----------------|----------|--------------|-----------|----------|------|
| Rep.Block.Plot | Identity | Sigma2       |           | 4.699    | 0.27 |

| Fixed term | Wald statistic | n.d.f. | F statistic | d.d.f. | F pr   |
|------------|----------------|--------|-------------|--------|--------|
| Name       | 442.49         | 95     | 4.66        | 643.3  | <0.001 |

| minLSD | meanLSD | maxLSD |
|--------|---------|--------|
| 1.891  | 2.141   | 2.851  |

**REML variance components analysis for number of Nr:0 apterous (non-winged) aphids**

Response variate: SQRT((Non\_winged+0.375))  
 Fixed model: Constant + Name  
 Random model: Rep + Rep.Block + Rep.Block.Plot  
 Number of units: 774 (70 units excluded due to zero weights or missing values)

Rep.Block.Plot used as residual term  
 Non-sparse algorithm with Fisher scoring

Estimated variance components

| Random term | component | s.e. |
|-------------|-----------|------|
| Rep         | 4.2       | 2.17 |
| Rep.Block   | -0.25     | 0.25 |

Residual variance model

| Term           | Factor   | Model(order) | Parameter | Estimate | s.e. |
|----------------|----------|--------------|-----------|----------|------|
| Rep.Block.Plot | Identity | Sigma2       |           | 14.65    | 0.84 |

Tests for fixed effects

Sequentially adding terms to fixed model

| Fixed term | Wald statistic | n.d.f. | F statistic | d.d.f. | F pr   |
|------------|----------------|--------|-------------|--------|--------|
| Name       | 539.85         | 95     | 5.68        | 639.5  | <0.001 |

Dropping individual terms from full fixed model

| Fixed term | Wald statistic | n.d.f. | F statistic | d.d.f. | F pr   |
|------------|----------------|--------|-------------|--------|--------|
| Name       | 539.85         | 95     | 5.68        | 639.5  | <0.001 |

| minLSD | meanLSD | maxLSD |
|--------|---------|--------|
| 3.327  | 3.769   | 5.025  |

**REML variance components analysis for Nr:0 total aphid number**

Response variate: SQRT((Total+0.375))  
 Fixed model: Constant + Name  
 Random model: Rep + Rep.Block + Rep.Block.Plot  
 Number of units: 774 (70 units excluded due to zero weights or missing values)

Rep.Block.Plot used as residual term  
 Non-sparse algorithm with Fisher scoring

Estimated variance components

| Random term | component | s.e. |
|-------------|-----------|------|
| Rep         | 5.22      | 2.7  |
| Rep.Block   | -0.25     | 0.29 |

Residual variance model

| Term           | Factor   | Model(order) | Parameter | Estimate | s.e. |
|----------------|----------|--------------|-----------|----------|------|
| Rep.Block.Plot | Identity | Sigma2       |           | 16.83    | 0.97 |

Tests for fixed effects

Sequentially adding terms to fixed model

| Fixed term | Wald statistic | n.d.f. | F statistic | d.d.f. | F pr   |
|------------|----------------|--------|-------------|--------|--------|
| Name       | 581.46         | 95     | 6.12        | 641.4  | <0.001 |

Dropping individual terms from full fixed model

| Fixed term | Wald statistic | n.d.f. | F statistic | d.d.f. | F pr   |
|------------|----------------|--------|-------------|--------|--------|
| Name       | 581.46         | 95     | 6.12        | 641.4  | <0.001 |

| minLSD | meanLSD | maxLSD |
|--------|---------|--------|
| 3.571  | 4.045   | 5.389  |
