# Supplementary material for: Towards new sources of resistance to the currant-lettuce aphid (Nasonovia ribisnigri)
Source: PubMed Central journal article supplement (PMC5209396; doi:10.1007/s11032-016-0606-4), 2017-01-03
Supplement: 11032_2016_606_MOESM11_ESM.pdf [file 11032_2016_606_MOESM11_ESM.pdf]

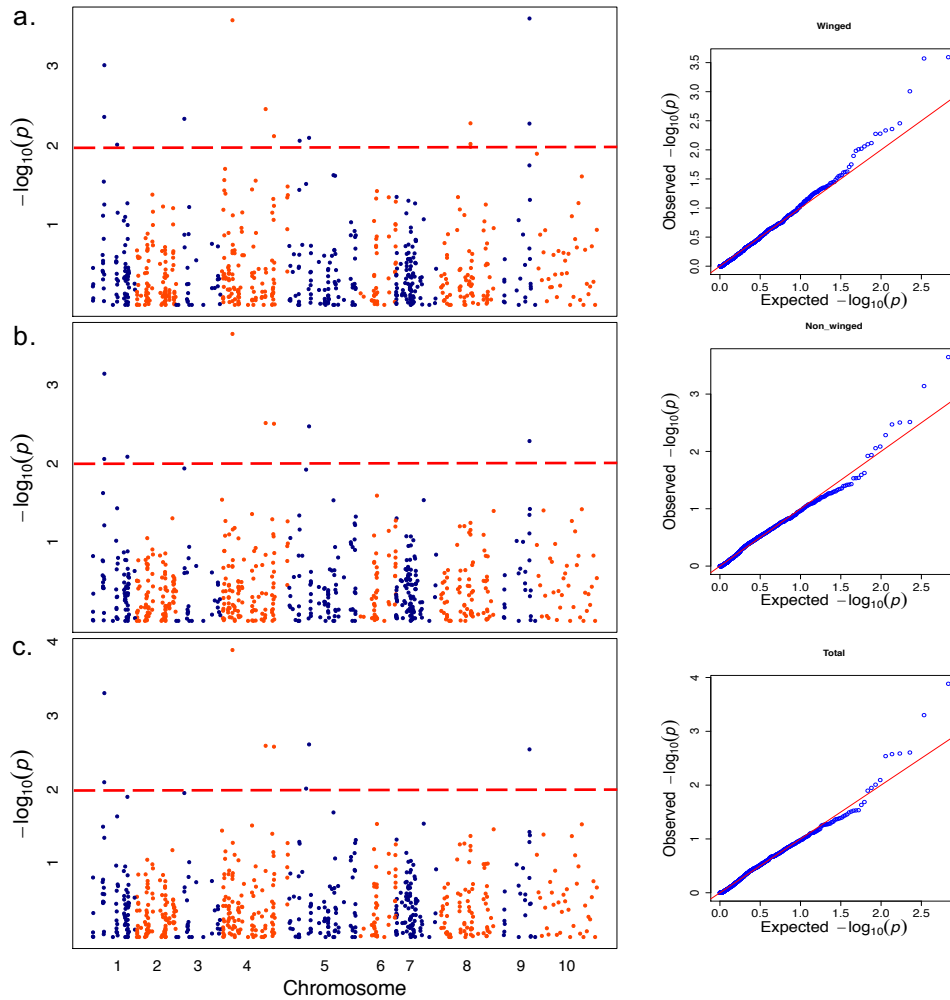

Figure S5 *Lactuca sativa* pseudo-chromosome distribution of  $-\log_{10} P$ -values for 646 LKAM associations with *N. ribisnigri* count data obtained from the VeGIN lettuce diversity set. Panels' a., b., and c. represent SNP associations with mean count data for alate, apterous, total-aphid count respectively. Horizontal dashed line represents a threshold of  $-\log_{10} P$ -value  $>2$ . Pseudo-chromosomes 1-9 and group-10 (un-mapped SNPs) alternately coloured blue and red. Each panel is accompanied with a Q-Q plot following genomic control for the three phenotype groups.
